# Supplementary material
Source: publisher site journal article supplement (https://www.dovepress.com/article/391731)
Supplement: Supplementary file 1 [file get_supplementary_file.php]

**Supplementary Table S1.** A detailed description of candidate predictors

| **Variables** | **Measurements** |
| --- | --- |
| Age | Age at baseline survey: 60-75 years, 75-90 years, ≥90 years |
| Gender | male, female |
| Residence | Current place of residence: rural, urban |
| Marital status | Current marital status: married, others (including divorced, widowed, etc.) |
| Educational attainment | Highest educational attainment: primary school and below, middle school, high school, above high school |
| Household income per capita | Current household income per capita: <3000 yuan/month, 3000-5000 yuan/month, >5000 yuan/month |
| Health insurance | Current health insurance enrollment: no (had no health insurance), yes (had any type of social or commercial health insurance) |
| Smoking | Does the patient smoke: Never, previous, current |
| Drinking | Does the patient drink (at least once per week): Never, previous, current |
| Nutrition | How is the patient’s nutrition condition: poor, fair, good |
| Fruit consumption | How often does the patient eat fruit: <1 time/day, ≥1 time/day |
| Vegetable consumption | How often does the patient eat vegetable: <1 time/day, ≥1 time/day |
| Milk consumption | How often does the patient drink milk: <1 time/day, ≥1 time/day |
| Living arrangement | How is the patient’s living arrangement: living with others, living alone, living in the nursing homes |
| Social isolation | Measured using the Lubben Social Network Scale-6 (LSNS-6) scale. A total score of ≤12 was considered as social isolation (coded as “yes”), or otherwise no social isolation (coded as “no”). |
| Sleep problem | Does the patient have sleep problems: no, yes |
| Body mass index (BMI) | BMI (kg/m2) was calculated based on height and weight, and categorized into underweight (<18.5), normal (18.5-24), overweight or obese (≥24). |
| Life satisfaction | How satisfied is the patient with current life: poor, fair, good |
| Frailty | Frailty was assessed using the care partner-derived frailty index based upon comprehensive geriatric assessment (CP-FI-CGA) scale, which was previously validated in emergency setting and completed by the caregiver of patient. We constructed the frailty index (FI) following the established studies, which was the proportion of deficits present in an individual out of a possible 44 health deficits covering chronic disease conditions, hearing or vision impairment, activities of daily living, psychological functions, and other health-related dimensions. Each deficit was treated as a dichotomous or ordinal variable, measured on a scale between 0 and 1 to denote the increasing severity of health deficits. We then quantified the overall level of frailty for a given participant by summing up all values of the 44 deficits, and divided the total frailty score by 44 to obtain frailty index (which ranges between 0~1). |
| Polypharmacy | Does the patient currently take five or more prescription medications: no, yes |
| Comorbidity | Does the patient currently have five or more chronic non-communicable diseases: no, yes |
| Hypertension | Does the patient have hypertension: no, yes |
| Diabetes | Does the patient have diabetes: no, yes |
| Stroke | Does the patient have stroke: no, yes |
| ADL limitation | Measured using the Activity of Daily Living (ADL) Scale, which included six items (namely, bathing, dressing, feeding oneself, using the toilet, getting in or out of bed and controlling urination and defecation. ADL limitation was defined if the patient had difficulty in at least 1 of the previously described ADL activities (coded as “yes”), or otherwise “no”. |
